# Supplementary material for: Clinicopathological findings and imaging features of intraductal papillary neoplasms in bile ducts
Source: PeerJ. 2020 Sep 30;8:e10040. doi: 10.7717/peerj.10040 (PMC7532777; doi:10.7717/peerj.10040)
Supplement: Supplemental Information 1 [file peerj-08-10040-s001.xlsx]

## Sheet: Sheet1
姓名	pathology	group	age	sex	jaundice	History of previous biliary surgery	stones	TB	DB	ALT	AST	ALP	CA199	CA125	CA242	CEA
#	Invasive cancer	1	66	1	1	0	0	196.6	118.4	44.4	72.7	178	18.27	22.6	24.5	4.2
#	Invasive cancer	1	61	0	1	1	1	149.9	94.9	461	421.9	451.6	30.88	18.64	5.75	0.63
#	Invasive cancer	1	48	0	0	0	1	16.7	9.5	46.7	54.53	119	30.53	11.28	19.7	2.01
#	Invasive cancer	1	58	1	1	1	1	96.9	58.9	20.6	69.2	250	18.27	15.83	4.67	0.7
#	Invasive cancer	1	72	1	1	1	0	39.3	22.6	88.1	57.41	552	83.44	21.25	12.92	1.6
#	Invasive cancer	1	61	0	0	1	1	37	11.6	88.5	65.6	379	130	22.6	178.6	24.5
#	Invasive cancer	1	54	1	1	1	1	213	142.1	75.4	55.28	264	44.85	10.9	24.5	1.7
#	Invasive cancer	1	65	1	1	0	0	246.3	129.9	45.8	34.9	345.3	32.84	42.18	9.53	7.1
#	Invasive cancer	1	41	0	1	1	1	122.8	0.9	106.7	102.32	296	332.03	20.78	19.35	11.7
#	Invasive cancer	1	73	1	1	1	1	227.7	155.4	52.7	84.09	140	36.7	8.52	39	10.97
#	Invasive cancer	1	68	0	1	1	1	103.3	69	74.6	112.05	663	32.84	5.89	11.88	2.76
#	Invasive cancer	1	73	1	1	1	1	350.4	228.7	50.4	80.32	420	255.55	28.98	57.1	10.11
#	Invasive cancer	1	60	1	1	1	1	146.7	98.5	137.6	210.34	205	367.2	29.7	43.1	8.3
#	Invasive cancer	1	62	0	1	1	1	137.6	93.7	498.2	198.54	474	448.7	34.14	278.8	14
#	Invasive cancer	1	53	1	0	0	1	13.9	5.3	46.1	30.69	85	27.23	10.8	8.59	1.56
#	Invasive cancer	1	66	0	1	1	1	92.2	66.4	230.8	164.4	533.8	495.17	35	119.8	5
#	Invasive cancer	1	75	1	1	1	1	108.9	75.8	46.7	43.91	908	28.47	19.7	7.81	1.66
#	Invasive cancer	1	51	1	0	1	1	53.35	33.99	42	95.6	232	415.55	28.98	57.1	4.34
#	Invasive cancer	1	68	0	0	0	1	13	3.6	14.4	21.29	98	21.33	6.14	7.81	1.54
#	Invasive cancer	1	65	0	0	0	1	36.1	15.6	157	232.4	167	52.69	15.1	24.89	2.15
#	Invasive cancer	1	59	0	1	1	1	44.5	24.8	77.4	58.6	430	463.87	31.83	198.7	19
#	Invasive cancer	1	73	0	1	1	1	19.7	6.4	52.8	69.98	159	17.35	9.76	7.19	4.2
#	Invasive cancer	1	63	0	0	1	1	19.4	7.9	258	123.8	476	35.03	14.81	26.7	1.87
#	Invasive cancer	1	49	1	1	0	0	41.2	27.9	53.1	34.74	386	311.23	17.95	94.88	4.6
#	Invasive cancer	1	63	0	1	1	1	57.3	29.6	88.2	64.84	278	116.4	23.61	47.8	6.81
#	Invasive cancer	1	60	1	1	0	1	312.7	250.2	349.7	271.3	527	438.27	124.27	78.7	8.9
#	Invasive cancer	1	71	0	1	0	1	224.6	132.6	151.4	118.2	331	30.31	16.69	15.4	1.48
#	Invasive cancer	1	50	0	0	0	0	30.4	13.6	126.4	169.7	585	370.87	12.22	44.8	4.14
#	Invasive cancer	1	59	0	0	0	0	21.1	7.1	12.3	29.88	148	531.27	19.53	21.9	3.91
#	Invasive cancer	1	56	0	1	1	1	448.9	334.9	169.3	166.17	540	32.42	10.44	24.24	2.22
#	Invasive cancer	1	36	0	0	0	0	11.7	2.6	20.3	70.67	59	31.11	9.7	11.9	0.37
#	Invasive cancer	1	55	1	1	1	1	143.4	99	122.1	41.63	307	70.99	75.18	18.91	1.52
			60.4375	118.017	74.1059	119.022	107.093	343.334	167.239	24.2188	48.3288	5.48594
			9.4696	110.611	81.2423	120.753	86.1911	195.024	181.238	22.6498	63.2219	5.60664
#	Atypical hyperplasia	2	72	49.8	27.4	343	185.98	250	33.75	9.8	18.33	3.07
#	Atypical hyperplasia	2	49	14.4	8	26.6	25.96	100	45.18	18.5	9.53	1.4
#	Atypical hyperplasia	2	85	339.4	259.6	68.3	117.04	480	117.6	11.6	42.12	4.2
#	Atypical hyperplasia	2	57	27.8	10.9	249.5	145.9	389	85.46	50.67	24.37	1.73
#	Atypical hyperplasia	2	63	128.1	113.7	40.9	59.4	442.9	105.25	13.28	26.62	1.26
#	Atypical hyperplasia	2	61	103.8	85.4	41	39.9	220.8	13.24	13.34	4.4	0.73
#	Atypical hyperplasia	2	66	175.68	101.95	151	287	229.8	158.02	37.42	1.971	10.5
#	Atypical hyperplasia	2	66	22.8	8.9	52.9	53.6	342	15.02	10.5	2.38	0.5
#	Atypical hyperplasia	2	61	14.7	4.2	17.3	21.7	96.8	3.361	6.33	1.91	0.67
#	Atypical hyperplasia	2	54	18.9	12.1	38.9	37.1	118	32.76	27.71	14.87	0.94
#	Atypical hyperplasia	2	64	167.6	85.7	33.4	50.8	189	107.21	72.58	17.9	2.23
#	Atypical hyperplasia	2	66	234.5	158.7	368.3	420.8	202.3	36.1	14.44	5.4	2.52
#	Atypical hyperplasia	2	51	14	5.8	69.4	32.79	135	31.61	6.98	4.62	0.67
#	Atypical hyperplasia	2	61	13.6	7.9	27.9	50.42	117	15.64	10.82	4.06	2.4
			62.5714	94.6486	63.5893	109.171	109.171	236.614	57.1572	21.7121	12.7486	2.34429
			9.02743	102.22	76.0564	121.381	117.301	129.184	48.1588	19.3259	11.9907	2.58045
#	Low grade adenoma	3	69	25.6	14.1	69.8	112.59	736	12.25	5.7	6.4	1.24
#	Low grade adenoma	3	79	41.3	23.3	53.8	48.4	366	55.78	12.6	38.1	2.4
#	Low grade adenoma	3	68	14.4	4.8	29.6	38.93	165	6.7	13.54	3.51	1.17
#	Low grade adenoma	3	58	138.7	87.32	15.3	20.3	88.2	44.12	30.82	2.15	2.86
#	Low grade adenoma	3	59	120.8	90	264.5	119.9	375.8	11	12.59	2.31	0.57
#	adenoma	3	48	12.4	4.5	15.3	20.3	88.2	13.24	13.34	4.4	0.73
#	Low grade adenoma	3	43	13	5.2	180.4	68.85	267	9.36	15.48	14.41	1.72
#	Low grade adenoma	3	49	104.8	60.2	264.5	119.9	130	118.55	33.51	17.71	1.32
#	Low grade adenoma	3	63	259.7	125.4	29.6	38.93	95	165.22	29.75	17.52	1.94
#	Low grade adenoma	3	60	22.8	9.7	63.2	29.08	45	20.89	10.31	8.5	3.17
#	Low grade adenoma	3	59	130.5	75	87.6	76.19	121	117.09	30.87	39.41	4.02
#	adenoma	3	58	10.7	5.6	15.7	16.95	67	68.82	20.14	10.21	1.37
			59.4167	74.5583	42.0933	90.775	59.1933	212.017	53.585	19.0542	13.7192	1.87583
			9.88533	77.5218	43.0373	93.1689	39.6098	199.686	53.4407	9.61376	12.9106	1.04575

## Sheet: Sheet3
name	pathology	group	FZ	Surgery / diagnosis time	surgery method	R0/1/2	lymph node metasis	recurrence	survival time	age	survival time	event
#	Invasive cancer	1	1	2012-12-21	Bile incision and exploration + left hepatectomy	0			2016-10-02	66	46.0333	1
#	Invasive cancer	1	1	2014-06-03	Re-biliary exploration, left hepatectomy, resection of common bile duct cysts, intrabiliary drainage	0			2017-12-01	61	42.5667	0
#	Invasive cancer	1	1	2015-10-23	Laparoscopic left hepatectomy	0			2017-12-01	48	25.6667	1
#	Invasive cancer	1	1	2016-04-26	Cholestasis again, left external lobe resection	0			2017-12-01	58	19.4667	0
#	Invasive cancer	1	1	2016-04-26	Left hepatectomy, intrabiliary drainage	0			2017-12-01	72	19.4667	0
#	Invasive cancer	1	1	2017-04-10	Cholestasis again, left external lobe resection	0			2017-12-01	61	7.83333	0
#	Invasive cancer	1	1	2017-06-09	Re-biliary exploration, left hepatectomy, bile enteral drainage	0			2017-12-01	54	5.83333	0
#	Invasive cancer	1	1	2017-08-04	Bile incision and left hepatectomy	0			2017-12-01	65	3.96667	0
#	Invasive cancer	1	1	2017-09-05	PTCD	2			2017-12-01	73	2.9	0
#	Invasive cancer	1	1	2015-12-03	Biliary exploration and bile enteral drainage	2	1		2016-04-26	73	4.83333	1
#	Invasive cancer	1	1	2012-01-18	Common bile duct resection + left hepatectomy	0		2017-02-27	2017-12-01	60	71.4667	0
#	Invasive cancer	1	1	2013-03-19	Duodenal fistula repair, gastrostomy, gastrojejunostomy	2	1		2016-07-18	62	40.5667	1
#	Invasive cancer	1	1	2013-05-03	Bile incision and exploration + left hepatectomy	0			2017-12-01	53	55.7667	0
#	Invasive cancer	1	1	2015-04-20	Cholestasis again, left hepatectomy	0			2017-09-15	66	29.3	0
#	Invasive cancer	1	1	2013-04-01	Biliary exploration, T-tube drainage	0			2013-11-20	75	7.76667	1
#	Invasive cancer	1	1	2015-05-14	Left hepatectomy	0			2017-12-01	51	31.0667	0
#	Invasive cancer	1	1	2015-11-24	Bile incision and exploration, left liver resection	0			2017-12-01	68	24.6	0
#	Invasive cancer	1	1	2016-06-12	Laparoscopic bile resection and left bile resection	0			2017-12-01	65	17.9	0
#	Invasive cancer	1	1	2016-08-18	Re-biliary exploration, left hepatic liver, left tail leaflet, bile enteral drainage	0	1	2016-12-30	2017-09-08	59	12.8667	1
#	Invasive cancer	1	1	2016-11-07	Cholestasis again, left hepatectomy, distal gastrectomy, bile-gut, gastrointestinal anastomosis	1	1		2017-12-01	73	12.9667	0
#	Invasive cancer	1	1	2017-03-15	Left inner lobe, left tail sheet, gastric antrum resection, gastrojejunostomy, biliary-jejunostomy, diaphragm repair	2	1		2017-12-01	63	8.7	0
#	Invasive cancer	1	1	2017-06-27	Bile incision and bile exploration, right hepatectomy, bile enteral drainage	0			2017-12-01	49	5.23333	0
#	Invasive cancer	1	1	2016-04-25	Re-biliary exploration, left hepatectomy, bile enteral drainage	0		2017-05-14	2017-08-02	63	15.4667	1
#	Invasive cancer	1	1	2014-04-25		2			2015-07-12	60	14.7667	1
#	Invasive cancer	1	1	2016-01-18		0			2017-12-01	71	22.7667	0
#	Invasive cancer	1	1	2016-11-09		2	1		2017-05-02	50	5.8	1
#	Invasive cancer	1	1	2016-12-29		0			2017-12-01	59	11.2333	0
#	Invasive cancer	1	1	2015-08-19	Biliary exploration and bile enteral drainage	0			2017-12-01	56	27.8333	0
#	Invasive cancer	1	1	2013-10-18	PTCD	2			2016-12-10	36	38.3	1
#	Invasive cancer	2	2	2017-03-03	Bile incision, left hepatic liver, left tail lobe resection	0			2017-12-01	72	9.1	0
#	Invasive cancer	2	2	2017-07-05	Re-biliary exploration, right hepatic liver, whole tail lobe, bile enteral drainage	0			2017-12-01	49	4.96667	0
#	Invasive cancer	2	2	2013-10-18	PTCD	2			2014-06-24	85	8.3	1
#	Atypical hyperplasia	2	2	2015-07-13	Re-biliary exploration, left hepatic liver + left tail resection, intrabiliary drainage	0			2017-12-01	57	29.0667	0
#	Atypical hyperplasia	2	2	2012-03-05	Left hepatic liver + left tail leaf + bile enteral drainage	0		2012-11-26	2017-12-01	63	69.9	0
#	Atypical hyperplasia	2	2	2012-07-20	Bile-cutting bile exploration + T-tube drainage	2			2016-10-09	61	51.4	0
#	Atypical hyperplasia	2	2	2012-09-10	Bile-cutting bile exploration + T-tube drainage	2			2015-08-01	66	35.1667	1
#	Atypical hyperplasia	2	2	2016-02-26	Cholestasis again, left hepatectomy	0			2017-12-01	66	21.4667	0
#	Atypical hyperplasia	2	2	2017-03-29	Biliary exploration hepatic lobectomy	0			2017-12-01	54	8.23333	0
#	Atypical hyperplasia	2	2	2017-07-19	Re-biliary exploration, T-tube drainage	2			2017-12-01	64	4.5	0
#	Atypical hyperplasia	2	2	2010-01-10	Bile resection, left liver resection, bile enteral drainage	R0			2014-11-12	66	58.9	0
#	Atypical hyperplasia	2	2	2015-05-11	Bile resection, biliary exploration, liver section 3 and 4a resection	0			2017-12-01	51	31.1667	0
#	Atypical hyperplasia	3	2	2015-07-28	Biliary exploration and bile enteral drainage	0			2017-12-01	69	28.5667	0
#	Atypical hyperplasia	3	2	2017-05-22		0			2017-09-10	79	3.7	1
#	Atypical hyperplasia	3	2	2014-03-13	Left liver, left tail + bile enteral drainage	0			2017-12-01	68	45.3	0
#	Atypical hyperplasia	3	2	2014-08-06	Last Page + Right Hepatectomy, Intestinal Drainage	0			2017-12-01	58	40.4333	0
#	Atypical hyperplasia	3	2	2014-10-09	Right triplet + total tail resection, bile enteral drainage	0			2017-12-01	59	38.3	0
#	Low grade adenoma	3	2	2014-12-05	Bile incision, bile exploration, left hepatectomy	0			2017-12-01	48	36.4	0
#	Low grade adenoma	3	2	2016-01-18	Re-biliary exploration, right anterior lobe resection, bile enteral drainage	0			2017-12-01	43	22.7667	0
#	Low grade adenoma	3	2	2016-05-09	Bile-cutting bile exploration, T-tube drainage (aosc)	2			2016-08-10	63	3.1	0
#	Low grade adenoma	3	2	2017-04-20	Probing again for right hepatectomy and right tail lobe resection	0		2017-08-11	2017-12-01	59	7.5	1
#	Low grade adenoma	3	2	2016-12-07	Bile resection and bile exploration, 4b liver resection				2017-12-01	58	11.9667	0
#	adenoma	4		2012-12-05	Re-intestinal drainage	2			Lost to follow	41
#	Low grade adenoma	4		2015-08-21	Cholestasis again, duodenal repair, gastric jejunostomy	0			Lost to follow	68
#	Low grade adenoma	4		2015-07-16	Bile incision and bile exploration, T-tube drainage	0			Lost to follow	55
#	Low grade adenoma	5		2016-08-04	Cholestasis again, left hepatectomy	0			Lost to follow	61
#	Low grade adenoma	5		2016-09-12	Re-biliary exploration, left liver resection, bile-intestinal drainage				Lost to follow	61
#	Low grade adenoma	6		2016-02-19	Cholestasis again, left external lobe resection	0			Lost to follow	49
#	adenoma	6		2016-09-17	Re-biliary exploration, left hepatectomy, bile enteral drainage	0			Lost to follow	60

## Sheet: Sheet7
TB	DB	ALT	AST	ALP	CA199	CA125	CA242	CEA
196.6	118.4	44.4	72.7	178	18.27	22.6	24.5	4.2
149.9	94.9	461	421.9	451.6	30.88	18.64	5.75	0.63
16.7	9.5	46.7	54.53	119	30.53	11.28	19.7	2.01
96.9	58.9	20.6	69.2	250	18.27	15.83	4.67	0.7
39.3	22.6	88.1	57.41	552	83.44	21.25	12.92	1.6
37	11.6	88.5	65.6	379	130	22.6	178.6	24.5
213	142.1	75.4	55.28	264	44.85	10.9	24.5	1.7
246.3	129.9	45.8	34.9	345.3	32.84	42.18	9.53	7.1
122.8	0.9	106.7	102.32	296	332.03	20.78	19.35	11.7
227.7	155.4	52.7	84.09	140	36.7	8.52	39	10.97
103.3	69	74.6	112.05	663	32.84	5.89	11.88	2.76
350.4	228.7	50.4	80.32	420	255.55	28.98	57.1	10.11
146.7	98.5	137.6	210.34	205	367.2	29.7	43.1	8.3
137.6	93.7	498.2	198.54	474	448.7	34.14	278.8	14
13.9	5.3	46.1	30.69	85	27.23	10.8	8.59	1.56
92.2	66.4	230.8	164.4	533.8	495.17	35	119.8	5
108.9	75.8	46.7	43.91	908	28.47	19.7	7.81	1.66
53.35	33.99	42	95.6	232	415.55	28.98	57.1	4.34
13	3.6	14.4	21.29	98	21.33	6.14	7.81	1.54
36.1	15.6	157	232.4	167	52.69	15.1	24.89	2.15
44.5	24.8	77.4	58.6	430	463.87	31.83	198.7	19
19.7	6.4	52.8	69.98	159	17.35	9.76	7.19	4.2
19.4	7.9	258	123.8	476	35.03	14.81	26.7	1.87
41.2	27.9	53.1	34.74	386	311.23	17.95	94.88	4.6
57.3	29.6	88.2	64.84	278	116.4	23.61	47.8	6.81
312.7	250.2	349.7	271.3	527	438.27	124.27	78.7	8.9
224.6	132.6	151.4	118.2	331	30.31	16.69	15.4	1.48
30.4	13.6	126.4	169.7	585	370.87	12.22	44.8	4.14
21.1	7.1	12.3	29.88	148	531.27	19.53	21.9	3.91
448.9	334.9	169.3	166.17	540	32.42	10.44	24.24	2.22
11.7	2.6	20.3	70.67	59	31.11	9.7	11.9	0.37
143.4	99	122.1	41.63	307	70.99	75.18	18.91	1.52
49.8	27.4	343	185.98	250	33.75	9.8	18.33	3.07
14.4	8	26.6	25.96	100	45.18	18.5	9.53	1.4
339.4	259.6	68.3	117.04	480	117.6	11.6	42.12	4.2
27.8	10.9	249.5	145.9	389	85.46	50.67	24.37	1.73
128.1	113.7	40.9	59.4	442.9	105.25	13.28	26.62	1.26
103.8	85.4	41	39.9	220.8	13.24	13.34	4.4	0.73
175.68	101.95	151	287	229.8	158.02	37.42	1.971	10.5
22.8	8.9	52.9	53.6	342	15.02	10.5	2.38	0.5
14.7	4.2	17.3	21.7	96.8	3.361	6.33	1.91	0.67
18.9	12.1	38.9	37.1	118	32.76	27.71	14.87	0.94
167.6	85.7	33.4	50.8	189	107.21	72.58	17.9	2.23
234.5	158.7	368.3	420.8	202.3	36.1	14.44	5.4	2.52
14	5.8	69.4	32.79	135	31.61	6.98	4.62	0.67
13.6	7.9	27.9	50.42	117	15.64	10.82	4.06	2.4
25.6	14.1	69.8	112.59	736	12.25	5.7	6.4	1.24
41.3	23.3	53.8	48.4	366	55.78	12.6	38.1	2.4
14.4	4.8	29.6	38.93	165	6.7	13.54	3.51	1.17
138.7	87.32	15.3	20.3	88.2	44.12	30.82	2.15	2.86
120.8	90	264.5	119.9	375.8	11	12.59	2.31	0.57
12.4	4.5	15.3	20.3	88.2	13.24	13.34	4.4	0.73
13	5.2	180.4	68.85	267	9.36	15.48	14.41	1.72
104.8	60.2	264.5	119.9	130	118.55	33.51	17.71	1.32
259.7	125.4	29.6	38.93	95	165.22	29.75	17.52	1.94
22.8	9.7	63.2	29.08	45	20.89	10.31	8.5	3.17
130.5	75	87.6	76.19	121	117.09	30.87	39.41	4.02
10.7	5.6	15.7	16.95	67	68.82	20.14	10.21	1.37
103.385	64.9441	110.8	97.6843	290.405	117.153	22.5452	32.5798	3.98069
102.522	73.647	114.406	88.7423	189.113	148.619	19.6554	50.4925	4.65704

## Sheet: Sheet8
R0/1/2	lymph node metasis	age	age	sex	CA242	CA2	stones	jaundice	CA19-9	CA1	CEA	CE	survival time	event	Differentiation
0	0	66	1	1	24.5	1	0	1	18.27	0	4.2	0	46.0333	1	1
0	0	61	1	0	5.75	0	1	1	30.88	0	0.63	0	42.5667	0	1
0	0	48	0	0	19.7	0	1	0	30.53	0	2.01	0	25.6667	1	3
0	0	58	0	1	4.67	0	1	1	18.27	0	0.7	0	19.4667	0	2
0	0	72	1	1	12.92	0	0	1	83.44	1	1.6	0	19.4667	0	3
0	0	61	1	0	178.6	1	1	0	130	1	24.5	1	7.83333	0	1
0	0	54	0	1	24.5	1	1	1	44.85	1	1.7	0	5.83333	0	1
0	0	65	0	1	9.53	0	0	1	32.84	0	7.1	1	3.96667	0	2
2	0	73	1	1	39	1	1	1	36.7	1	10.97	1	2.9	0	1
2	1	73	1	1	57.1	1	1	1	255.55	1	10.11	1	4.83333	1	3
0	0	60	1	1	43.1	1	1	1	367.2	1	8.3	1	71.4667	0	1
2	1	62	1	0	278.8	1	1	1	448.7	1	14	1	40.5667	1	2
0	0	53	0	1	8.59	0	1	0	27.23	0	1.56	0	55.7667	0	1
0	0	66	1	0	119.8	1	1	1	495.17	1	5	1	29.3	0	2
0	0	75	1	1	7.81	0	1	1	28.47	0	1.66	0	7.76667	1	2
0	0	51	0	1	57.1	1	1	0	415.55	1	4.34	0	31.0667	0	1
0	0	68	1	0	7.81	0	1	0	21.33	0	1.54	0	24.6	0	1
0	0	65	1	0	24.89	1	1	0	52.69	1	2.15	0	17.9	0	1
0	1	59	0	0	198.7	1	1	1	463.87	1	19	1	12.8667	1	2
2	1	73	1	0	7.19	0	1	1	17.35	0	4.2	0	12.9667	0	1
2	1	63	1	0	26.7	1	1	0	35.03	1	1.87	0	8.7	0	1
0	0	49	0	1	94.88	1	0	1	311.23	1	4.6	1	5.23333	0	1
0	0	63	1	0	47.8	1	1	1	116.4	1	6.81	1	15.4667	1	1
2	0	60	1	1	78.7	1	1	1	438.27	1	8.9	1	14.7667	1	3
0	0	71	1	0	15.4	0	1	1	30.31	0	1.48	0	22.7667	0	1
2	1	50	0	0	44.8	1	0	0	370.87	1	4.14	0	5.8	1	2
0	0	59	0	0	21.9	1	0	0	531.27	1	3.91	0	11.2333	0	1
0	0	56	0	0	24.24	1	1	1	32.42	0	2.22	0	27.8333	0	3
2	0	36	0	0	11.9	0	0	0	31.11	0	0.37	0	38.3	1	2
0	0	66	1	1	24.5	1	0	1	18.27	0	4.2	0	46.0333	1	1
0	0	61	1	0	5.75	0	1	1	30.88	0	0.63	0	42.5667	0	1
0	0	48	0	0	19.7	0	1	0	30.53	0	2.01	0	25.6667	1	3
0	0	58	0	1	4.67	0	1	1	18.27	0	0.7	0	19.4667	0	2
0	0	72	1	1	12.92	0	0	1	83.44	1	1.6	0	19.4667	0	3
0	0	61	1	0	178.6	1	1	0	130	1	24.5	1	7.83333	0	1
0	0	54	0	1	24.5	1	1	1	44.85	1	1.7	0	5.83333	0	1
0	0	65	0	1	9.53	0	0	1	32.84	0	7.1	1	3.96667	0	2
2	0	73	1	1	39	1	1	1	36.7	1	10.97	1	2.9	0	1
2	1	73	1	1	57.1	1	1	1	255.55	1	10.11	1	4.83333	1	3
0	0	60	1	1	43.1	1	1	1	367.2	1	8.3	1	71.4667	0	1
2	1	62	1	0	278.8	1	1	1	448.7	1	14	1	40.5667	1	2
0	0	53	0	1	8.59	0	1	0	27.23	0	1.56	0	55.7667	0	1
0	0	66	1	0	119.8	1	1	1	495.17	1	5	1	29.3	0	2
0	0	75	1	1	7.81	0	1	1	28.47	0	1.66	0	7.76667	1	2
0	0	51	0	1	57.1	1	1	0	415.55	1	4.34	0	31.0667	0	1
0	0	68	1	0	7.81	0	1	0	21.33	0	1.54	0	24.6	0	1
0	0	65	1	0	24.89	1	1	0	52.69	1	2.15	0	17.9	0	1
0	1	59	0	0	198.7	1	1	1	463.87	1	19	1	12.8667	1	2
2	1	73	1	0	7.19	0	1	1	17.35	0	4.2	0	12.9667	0	1
2	1	63	1	0	26.7	1	1	0	35.03	1	1.87	0	8.7	0	1
0	0	49	0	1	94.88	1	0	1	311.23	1	4.6	1	5.23333	0	1
0	0	63	1	0	47.8	1	1	1	116.4	1	6.81	1	15.4667	1	1
2	0	60	1	1	78.7	1	1	1	438.27	1	8.9	1	14.7667	1	3
0	0	71	1	0	15.4	0	1	1	30.31	0	1.48	0	22.7667	0	1
2	1	50	0	0	44.8	1	0	0	370.87	1	4.14	0	5.8	1	2
0	0	59	0	0	21.9	1	0	0	531.27	1	3.91	0	11.2333	0	1
0	0	56	0	0	24.24	1	1	1	32.42	0	2.22	0	27.8333	0	3
2	0	36	0	0	11.9	0	0	0	31.11	0	0.37	0	38.3	1	2
